# Supplementary material for: Analysis of Genomic Characteristics of SARS-CoV-2 in Italy, 29 January to 27 March 2020
Source: MDPI journal article supplement (doi:10.3390/v14030472), 2022-02-25
Supplement: s1 [file s1]

# Analysis of Genomic Characteristics of SARS-CoV-2 in Italy, 29 January to 27 March 2020

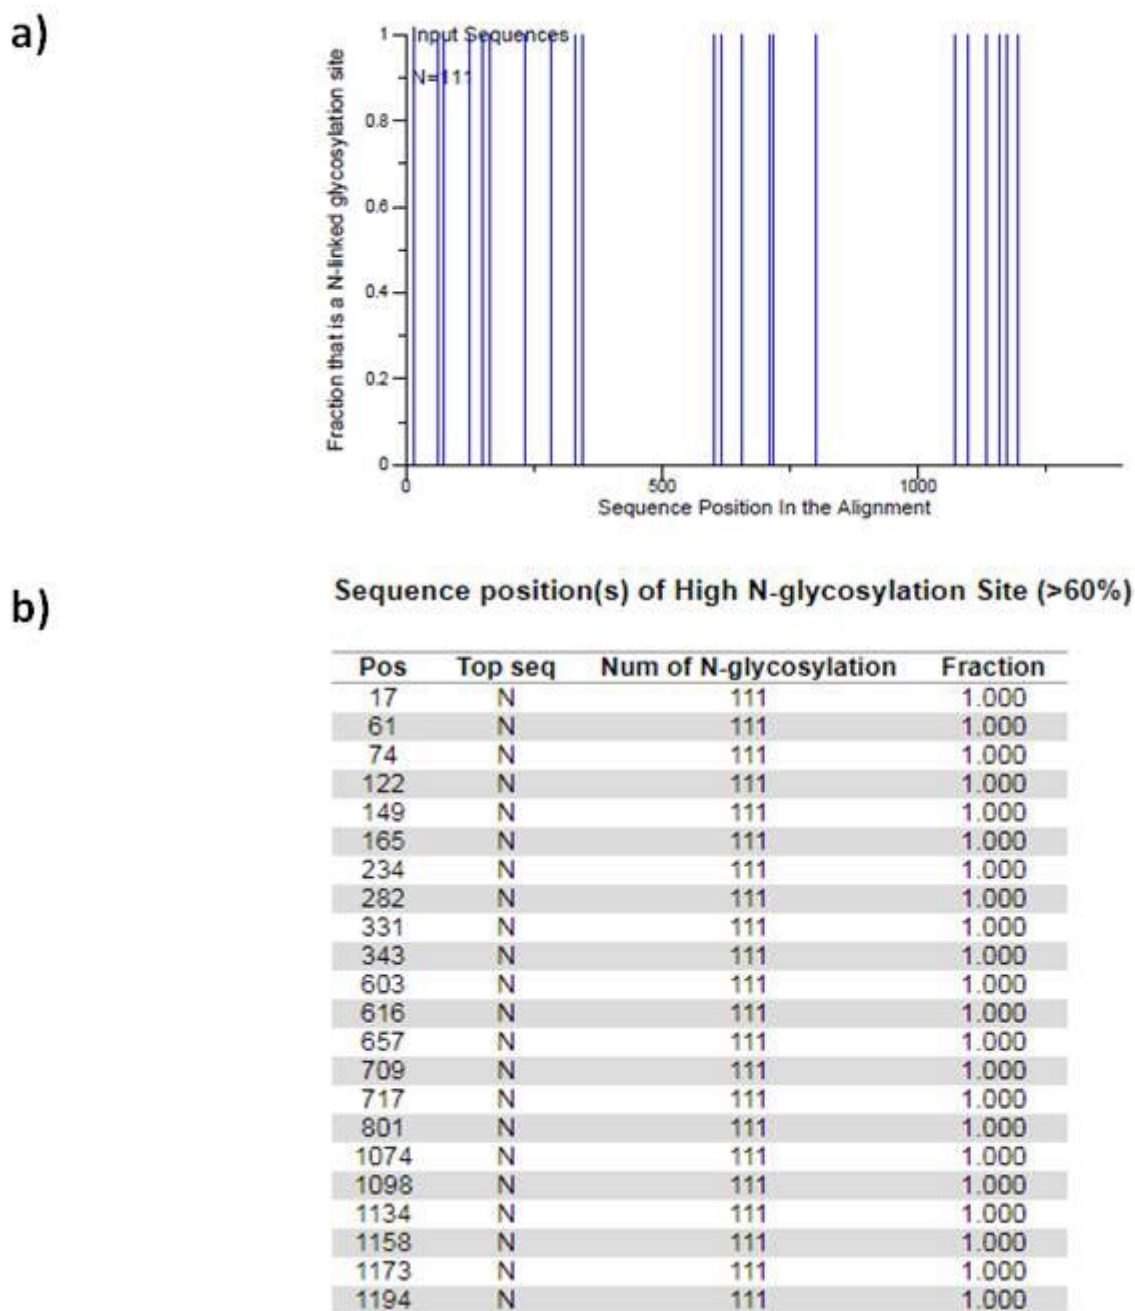

**Figure S1.** (a) The predicted N-glycosylation sites in SARS-CoV-2 surface glycoprotein Italian genomes obtained by using N-GlycoSite tool. (b) The positions, number and fraction of the predicted N-glycosylation sites were reported.

**Table S1.** The table reported the localization on the Italian territory of the regions / autonomous provinces that have been indicated with the same colors reported in the Maximum Likelihood Phylogenetic tree (Figure 1). Abruzzo, blue; Lazio, red; Lombardy, green; Friuli-Venezia Giulia, pink-fuchsia; Marche, grey; Veneto, light blue; Molise, violet; Sicily, ocre yellow; Sardinia, pink flesh; Campania, dark green; autonomous province (AP) of Trento, dark grey; Umbria, intermediate yellow; Tuscany, sea blue; Emilia Romagna, dark red; Apulia, light purple; Piedmont, very light yellow; Calabria, black; Basilicata, light green; Valle d'Aosta, green water; autonomous province (AP) of Bolzano, fuchsia.

| Regions and Autonomous Provinces (Italy) | localization |
|------------------------------------------|--------------|
| Valle d' Aosta                           | North        |
| Piedmont                                 | North        |
| Lombardy                                 | North        |
| Autonomous province of Bolzano           | North        |
| Autonomous province of Trento            | North        |
| Friuli – Venezia - Giulia                | North        |
| Veneto                                   | North        |
| Emilia - Romagna                         | North        |
| Tuscany                                  | Center       |
| Marche                                   | Center       |
| Umbria                                   | Center       |
| Lazio                                    | Center       |
| Abruzzo                                  | Center       |
| Molise                                   | Center       |
| Campania                                 | South        |
| Apulia                                   | South        |
| Basilicata                               | South        |
| Calabria                                 | South        |
| Sicily                                   | South        |
| Sardinia                                 | South        |
